# Supplementary material for: Sulfur vacancy activated field effect transistors based on ReS2nanosheets
Source: Royal Society of Chemistry journal article supplement (doi:10.1039/c5nr04625d), 2015-01-01
Supplement: c5nr04625d1.pdf [file c5nr04625d1.pdf]

# Sulfur Vacancy Activated Field Effect Transistors Based on ReS<sub>2</sub> Nanosheets

*Kai Xu,<sup>1</sup> Hui-Xiong Deng,<sup>2</sup> Zhenxing Wang,<sup>1</sup> Yun Huang,<sup>1</sup> Feng Wang,<sup>1</sup> Shu-Shen Li,<sup>2,3</sup> Jun-Wei Luo<sup>2,3\*</sup> and Jun He<sup>1\*</sup>*

*\*To whom correspondence should be addressed: hej@nanoctr.cn & jwluo@semi.ac.cn*

1. National Center for Nanoscience and Technology, Beijing 100190, P. R. China

2. State Key Laboratory for Superlattices and Microstructures, Institute of Semiconductors,  
Chinese Academy of Science, Beijing 100083, P. R. China

3. Synergetic Innovation Center of Quantum Information and Quantum Physics, University of  
Science and Technology of China, Hefei, Anhui 230026, China

Experimental Section:

*Synthesis of ReS<sub>2</sub>NSs on SiO<sub>2</sub>/Si and carbon fibers:* The ReS<sub>2</sub> NSs were grown on SiO<sub>2</sub>/Si substrates and carbon fibers in a horizontal two-zone tube furnace. In the typical synthesis process, S (0.3 g, 99.5% Alfa) powder as precursor was placed at front zone, while high purity ReO<sub>3</sub> (1 mg, 99.9% Alfa Aesar) powder was located at back zone. Substrates were faced down and placed on the upper side of ReO<sub>3</sub> powder. Before increasing the temperature, the tube was pumped and flushed with Ar gas several times. When the front zone temperature reach to 130-150 °C at a rate of 10 °Cmin<sup>-1</sup>, the back zone was raised to 500 °C at a heating rate of 20 °Cmin<sup>-1</sup> and held for 30 min. Finally, the furnace was allowed to cool down to room temperature and the whole synthesis process was under Ar (50 sccm) gas flow.

*Material Characterizations and electrical measurements:* The microstructure and morphologies of ReS<sub>2</sub> NSs were conducted by transmission electron microscopy (TEM, Tecnai F20) and by field emission scanning electron microscopy (FESEM, Hitach S-4800). The Raman spectrum was characterized on a confocal microscope based Raman spectrometer (RenishawInVia, 532 nm excitation laser). The slit width and instrument broadening are ~65 μm and 2 wave numbers, respectively. Chemical configurations were performed by XPS (ESCALAB250Xi). The electrical measurements were conducted on a probe station (Lakershore TTP4), which are equipped with semiconductor system (Keithley 4200), a vacuum pump, and temperature controller.

*First-principles calculations of the formation energy of defects:* The formation energie of defects are calculated as follows:<sup>1, 2</sup>

$$\Delta H_f(\alpha, q) = \Delta E(\alpha, q) + \sum n_i \mu_i + qE_F \quad (1)$$

where  $\Delta E(\alpha, q) = E(\alpha, q) - E(host) + \sum n_i E(i) + qE_{VBM}(host).$  (2)

$E (host)$  is the total energy of host material and  $E (\alpha, q)$  is the total energy of the host material containing defect  $\alpha$  in charge state  $q$ . The Fermi level  $E_F$  is referenced to the valence band maximum (VBM) of the host material and  $\mu_i$ , determined by experimental conditions, is the chemical potential of element  $i$ , which is referenced to total energy  $E_i$  of its elemental solid/gas.  $n_i$  is the number of atoms of element  $i$  removed from or added to the host materials and  $q$  is the number of electrons transferred from the supercell to the reservoirs in forming the defect cell.

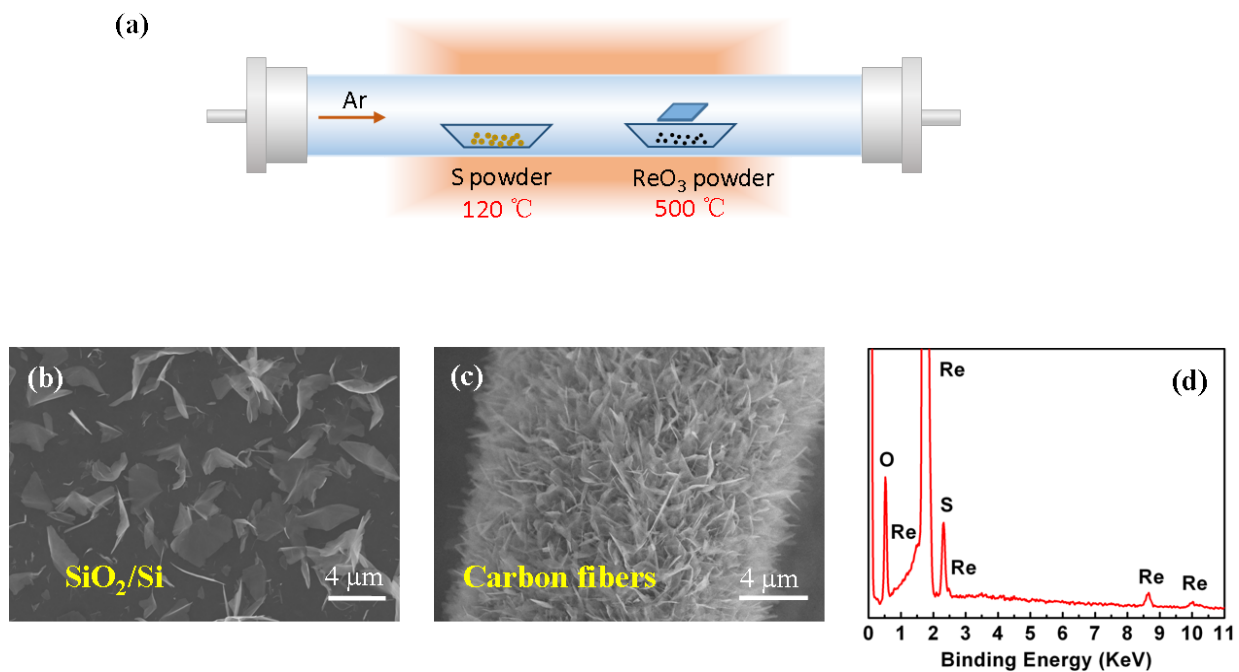

**Figure 1.** (a) schematic experimental setup for synthesizing ReS<sub>2</sub> NSs. (b), (c) SEM image of ReS<sub>2</sub> NSs grown on SiO<sub>2</sub>/Si and carbon fibers. (d) The corresponding SEM-EDS confirmed atomic percent of Re and S is exactly 1:2.

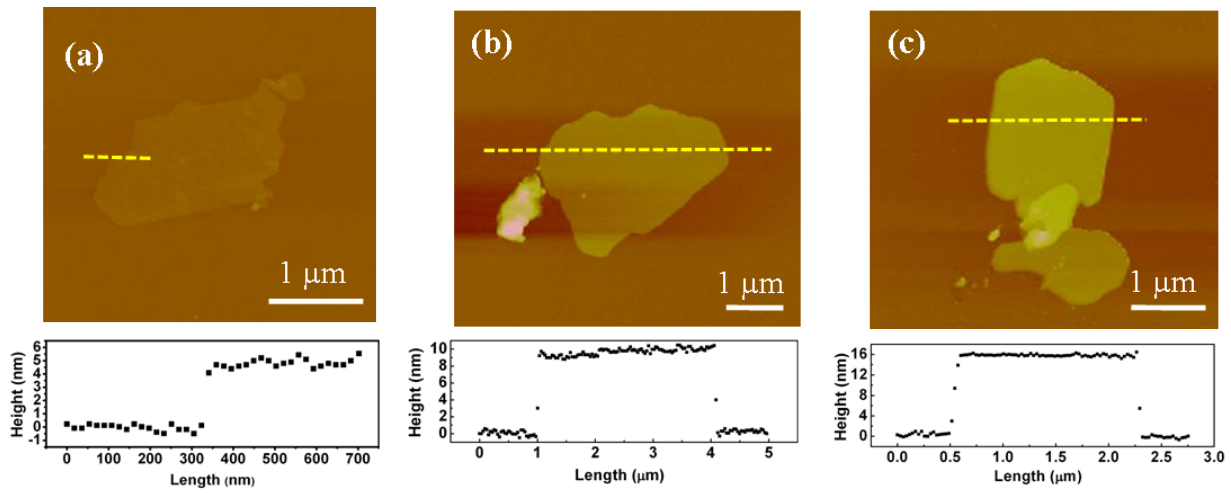

**Figure 2.** (a), (b), (c) AFM image of ReS<sub>2</sub> NSs grown on SiO<sub>2</sub>/Si. The thicknesses were found to be 4~15 nm.

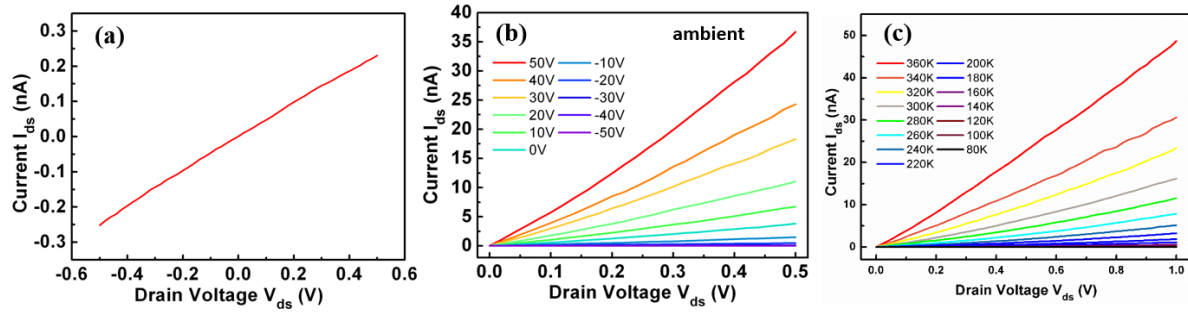

**Figure 3.** (a) The linearity of I-V curves indicates the ohmic contacts between ReS<sub>2</sub> NSs and Cr/Au electrodes. (b) Output characteristics in ambient. ( $V_g = -50V \sim 50V$ ,  $V_d = 3V$ ) (c) The I-V curves at variable temperature (80 K ~ 360 K,  $V_g = 0V$ )

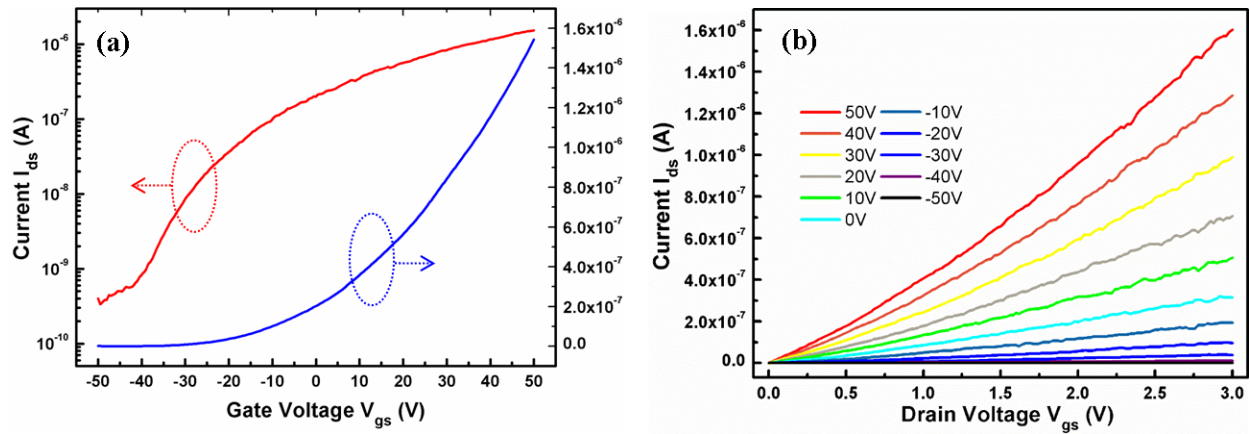

**Figure 4.** (a) The transfer and output characteristics of ReS<sub>2</sub> NSs FET were conducted before device was annealed at 300 °C for 3 hours. The on/off ratio is  $\sim 10^3$ , less than the value of annealed device.

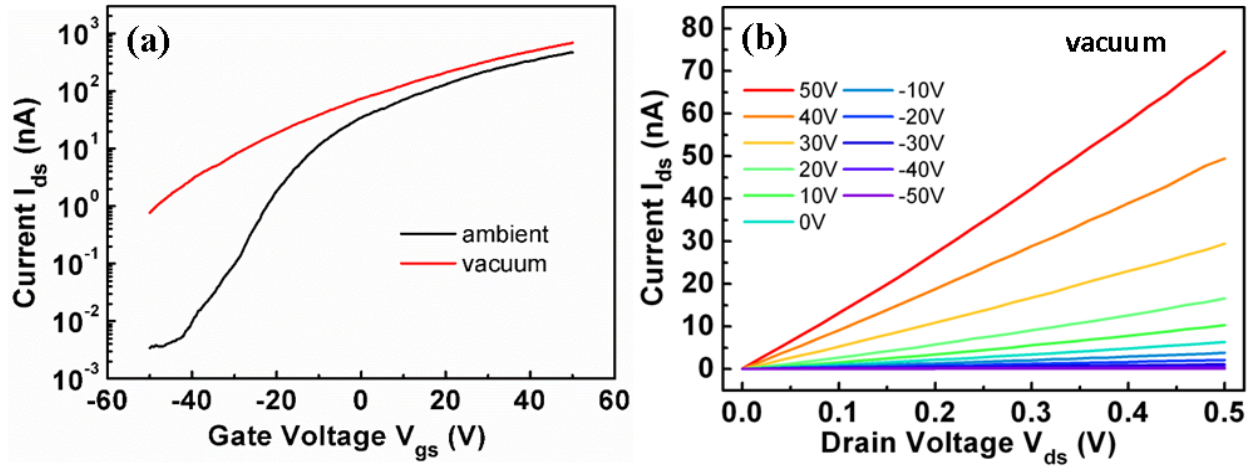

**Figure 5.**(a), (b) Transfer and output characteristics in vacuum. ( $V_g = -50V \sim 50V$ ,  $V_d = 3V$ ). A relatively large increase of the drain currents of transfer characteristics happened, especially off-state current



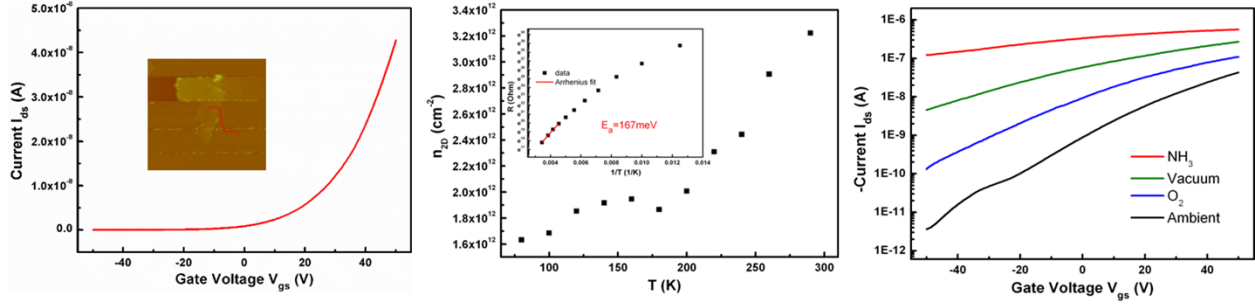

**Figure 6.** ReS<sub>2</sub> NSs device with thickness  $\sim 15\text{nm}$ . (a) Transfer characteristics in ambient. ( $V_g = -50\text{V}\sim 50\text{V}$ ,  $V_d = 3\text{V}$ ). The relationship between  $n_{2D}$  and temperature was plotted in (b). Activation energy  $\sim 167$  meV was obtained, similar with 175 meV. (c) Vacuum, O<sub>2</sub> and NH<sub>3</sub> atmosphere dependence of electronic measures were conducted.

- 1 S. H. Wei, *Comput. Mater. Sci.*, 2004, **30**, 337-48.
- 2 S. H. Wei and S. Zhang, *Phys. Rev. B*, 2002, **66**, 155211.
